# Supplementary material for: The Impact of Adjuvanted Influenza Vaccine on Disease Severity in the US: A Stochastic Model
Source: MDPI journal article supplement (doi:10.3390/vaccines11101525), 2023-09-26
Supplement: s1 [file s1]

## Mathematical equations used in the stochastic model

### 1. Uniform distribution:

$$x \sim U(a, b)$$

where  $x$  is the random variable,  $a$  is the lower bound, and  $b$  is the upper bound.

### 2. Normal distribution:

$$x \sim N(\mu, \sigma^2)$$

where  $x$  is the random variable,  $\mu$  is the mean, and  $\sigma^2$  is the variance.

### 3. Beta distribution:

$$x \sim \text{Beta}(\alpha, \beta)$$

where  $x$  is the random variable,  $\alpha$  is the alpha parameter, and  $\beta$  is the beta parameter.

**Table S1.** Estimated median (95% CI) hospitalized cases and deaths in patients ≥65 years of age from respiratory illnesses, cardiovascular disease, and other causes for no vaccination and aQIV vaccination

| Variable               | No vaccination               | QIVe                        | aQIV                        |
|------------------------|------------------------------|-----------------------------|-----------------------------|
| <b>Hospitalization</b> |                              |                             |                             |
| Respiratory illness    | 98,794<br>(44,347–196,134)   | 53,455<br>(22,235–100,237)  | 50,103<br>(20,877–94,401)   |
| CVD                    | 190,829<br>(82,306–378,236)  | 102,569<br>(45,951–196,580) | 97,120<br>(43,321–185,025)  |
| Other                  | 299,343<br>(135,789–533,813) | 156,958<br>(72,016–281,476) | 148,189<br>(68,062–263,408) |
| <b>Death</b>           |                              |                             |                             |
| Respiratory illness    | 9,303<br>(3,193–19,996)      | 4,815<br>(1,676–10,494)     | 4,549<br>(1,583–9,849)      |
| CVD                    | 17,349<br>(6,379–40,583)     | 9,045<br>(3,279–21,284)     | 8,543<br>(3,119–20,062)     |
| Other                  | 26,235<br>(10,051–56,806)    | 13,718<br>(5,277–29,702)    | 12,840<br>(4,986–27,807)    |

aQIV, adjuvanted quadrivalent influenza vaccine; CI, confidence interval; QIVe, egg-based quadrivalent influenza vaccine

**Table S2.** Incremental differences in estimated hospitalization rates and mortality due respiratory, CVD, and other complication of influenza for vaccination of adults  $\geq 65$  years with aQIV vs QIVe

| <b>Variable</b>        | <b>Median</b> | <b>Lower bound 95%<br/>CI</b> | <b>Upper bound 95%<br/>CI</b> |
|------------------------|---------------|-------------------------------|-------------------------------|
| <b>Hospitalization</b> |               |                               |                               |
| Respiratory illness    | 2,981         | 1,071                         | 6,301                         |
| CVD                    | 5,747         | 2,204                         | 12,248                        |
| Other                  | 8,768         | 3,583                         | 18,388                        |
| <b>Death</b>           |               |                               |                               |
| Respiratory illness    | 272           | 85                            | 655                           |
| CVD                    | 514           | 172                           | 1,267                         |
| Other                  | 765           | 271                           | 1,944                         |

aQIV, adjuvanted quadrivalent influenza vaccine; CI, confidence interval; QIVe, egg-based quadrivalent influenza vaccine
